# Supplementary material for: Immunogenic Properties and Antigenic Similarity of Virus-like Particles Derived from Human Polyomaviruses
Source: MDPI journal article supplement (doi:10.3390/ijms24054907), 2023-03-03
Supplement: s1 [file s1]

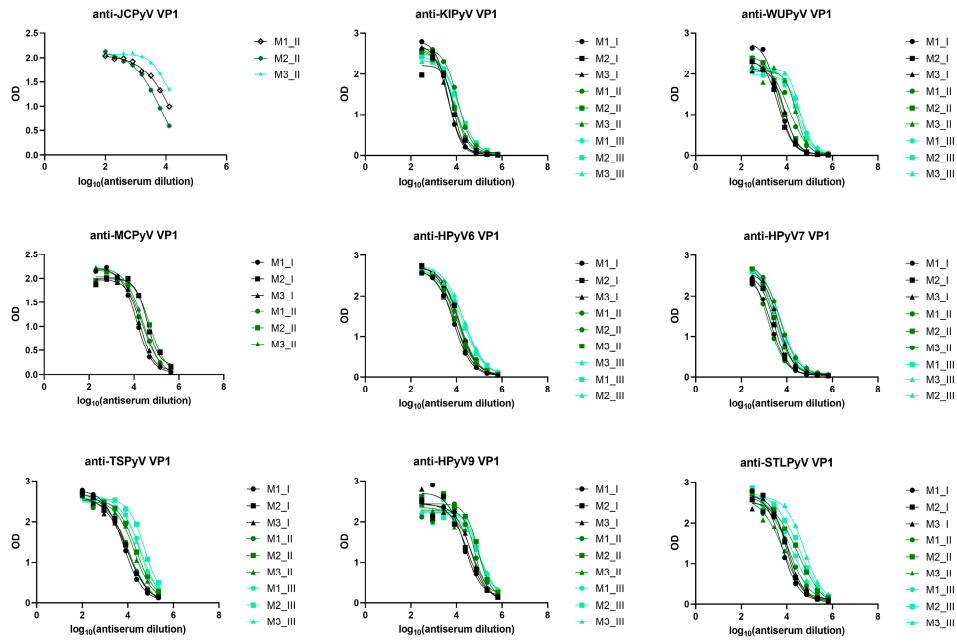

**Figure S1. Titration curves of mouse antiserum after immunisation with VP1 VLPs of HPyVs.** BALB/c mice ( $n = 3$  per group) were immunised with recombinant PyV VLPs composed of VP1 protein. Antibody response against the PyV was determined by an indirect ELISA after the first, second, and third immunisation with or without an adjuvant (see method section). OD – optical density. M1, M2, and M3 represent mice in the group. I, II, and III represent the first, second, and third immunisation.

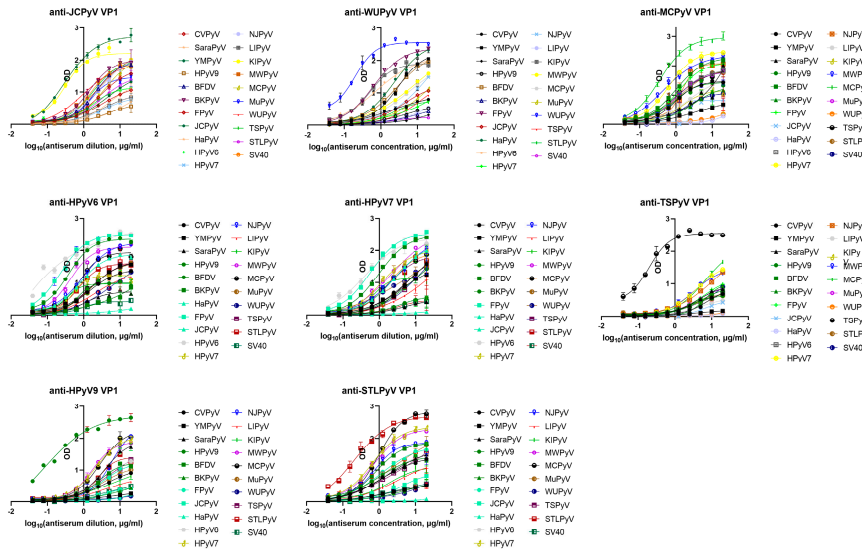

**Figure S2. Titration curves of cross-reactivity of mouse antisera with VP1 proteins of different PyVs.** Antisera raised against VP1-derived VLPs of different HPyVs were tested with different VP1 VLPs of human and animal PyVs by an indirect ELISA. The antiserum concentration ( $\mu\text{g}/\text{mL}$ ) was equated to the total protein concentration. The diluent buffer was used as a negative control. OD: optical density.

**Table S1. Titres of VP1-specific IgG in the antisera of mice immunised with VLPs of different PyVs.** The values obtained from three immunized mice in each group are indicated. Titres which exceeded 1:15,000 are highlighted in red.

| HPyV VP1<br>VLPs origin | Titre range           |                        |                         | Size of VLPs,<br>nm |
|-------------------------|-----------------------|------------------------|-------------------------|---------------------|
|                         | <i>I immunisation</i> | <i>II immunisation</i> | <i>III immunisation</i> |                     |
| JCPyV                   |                       | 7800– <b>21,490</b>    |                         | 45–50               |
| KIPyV                   | 4300–7540             | 6800–11,410            | 8900–11,970             | 25–30               |
| WUPyV                   | 4130–8180             | 6250– <b>25,640</b>    | <b>28,260–39,430</b>    | 25–35               |
| MCPyV                   | 12,960– <b>38,960</b> | <b>22,110–50,240</b>   |                         | 40–45               |
| HPyV6                   | 7660–12,350           | 8730–13'500            | <b>19,490–23,790</b>    | 25–35               |
| HPyV7                   | 2120–4760             | 1400–4980              | 3390–5120               | 25–40               |
| TSPyV                   | 6530–9480             | 10,750– <b>22,840</b>  | <b>316340–52,870</b>    | 45–50               |
| HPyV9                   | <b>22,030–44,780</b>  | <b>51,950–88,700</b>   | <b>87,120–112,550</b>   | 40–50               |
| STLPyV                  | 6230–11,710           | 7060– <b>29,740</b>    | <b>16,640–56,970</b>    | 40–50               |

**Table S2. Comparison of IgG titers raised against HPyV VP1-derived VLPs.** IgG titres after the first, second, and third immunisation as one data unit was compared between different PyV VP1 VLPs. The IgG titres were determined by an indirect ELISA against the antigens used for immunisations. Significantly different pairs were highlighted. Pairs with HPyV9 VP1 VLPs are shown in red. ns: not significantly different, \*  $p < 0.05$ , \*\*  $p < 0.01$ , \*\*\*  $p < 0.001$ , \*\*\*\*  $p < 0.0001$  according to two-way ANOVA followed by Šidák's multiple comparisons test.

| Comparison pair of<br>VP1 VLPs | Significance level | Comparison pair of<br>VP1 VLPs | Significance level |
|--------------------------------|--------------------|--------------------------------|--------------------|
| JCPyV vs. KIPyV                | ns                 | WUPyV vs. TSPyV                | ns                 |
| JCPyV vs. WUPyV                | ns                 | <b>WUPyV vs. HPyV9</b>         | <b>****</b>        |
| JCPyV vs. MCPyV                | ns                 | WUPyV vs. STLPyV               | ns                 |
| JCPyV vs. HPyV6                | ns                 | MCPyV vs. HPyV6                | ns, $p = 0.06$     |
| JCPyV vs. HPyV7                | ns                 | MCPyV vs. HPyV7                | ***                |
| JCPyV vs. TSPyV                | ns                 | MCPyV vs. TSPyV                | ns                 |
| <b>JCPyV vs. HPyV9</b>         | <b>****</b>        | <b>MCPyV vs. HPyV9</b>         | <b>***</b>         |
| JCPyV vs. STLPyV               | ns                 | MCPyV vs. STLPyV               | ns                 |
| KIPyV vs. WUPyV                | ns                 | HPyV6 vs. HPyV7                | ns                 |
| KIPyV vs. MCPyV                | **                 | HPyV6 vs. TSPyV                | ns                 |
| KIPyV vs. HPyV6                | ns                 | <b>HPyV6 vs. HPyV9</b>         | <b>****</b>        |
| KIPyV vs. HPyV7                | ns                 | HPyV6 vs. STLPyV               | ns                 |
| KIPyV vs. TSPyV                | ns                 | HPyV7 vs. TSPyV                | *                  |
| <b>KIPyV vs. HPyV9</b>         | <b>****</b>        | <b>HPyV7 vs. HPyV9</b>         | <b>****</b>        |
| KIPyV vs. STLPyV               | ns                 | HPyV7 vs. STLPyV               | ns                 |
| WUPyV vs. MCPyV                | ns                 | <b>TSPyV vs. HPyV9</b>         | <b>****</b>        |
| WUPyV vs. HPyV6                | ns                 | TSPyV vs. STLPyV               | ns                 |
| WUPyV vs. HPyV7                | ns                 | <b>HPyV9 vs. STLPyV</b>        | <b>****</b>        |

**Table S3. Monoclonal antibodies (MAbs) raised against VP1 VLPs of different PyVs.** The clones of MAbs are indicated. The reactivity of the MAbs with the respective VP1 proteins were investigated by ELISA and WB.

|              |       | MAb Clone | Isotype |    |               |       | MAb Clone | Isotype |    |
|--------------|-------|-----------|---------|----|---------------|-------|-----------|---------|----|
| VP1 VLPs     |       |           | ELISA   | WB | VP1 VLPs      |       |           | ELISA   | WB |
| <i>JCPyV</i> | 2E4   | IgG1      | +       | -  | <i>HPyV7</i>  | 1H1   | IgG1      | +       | +  |
|              | 8E8   | IgG2a     | +       | +  |               | 10E1  | IgG2a     | +       | +  |
|              | 8G8   | IgG1      | +       | +  |               | 11A2  | IgG1      | +       | +  |
|              | 11C8  | IgG2a     | +       | +  |               | 15A5  | IgG1      | +       | +  |
| <i>WUPyV</i> | 2H3   | IgG1      | +       | +  | <i>TSPyV</i>  | 17H6  | IgG1      | +       | +  |
|              | 4E12  | IgG2a     | +       | +  |               | 20F10 | IgG1      | +       | +  |
|              | 5H10  | IgG2b     | +       | +  |               | 24B1  | IgG2a     | +       | +  |
|              | 11D2  | IgG1      | +       | -  |               | 2B4   | IgG2a     | +       | -  |
|              | 11F5  | IgG1      | +       | +  |               | 5E6   | IgG2a     | +       | -  |
|              | 11G10 | IgG1      | +       | +  |               | 7A2   | IgG1      | +       | -  |
|              | 11G2  | IgG1      | +       | -  |               | 9F2   | IgG1      | +       | -  |
|              | 12F8  | IgG2a     | +       | +  |               | 9D3   | IgG1      | +       | -  |
|              | 12F1  | IgG2a     | +       | +  |               | 16H6  | IgG2a     | +       | -  |
|              | 5G8   | IgG2a     | +       | -  |               | 17G11 | IgG2a     | +       | -  |
| <i>KIPyV</i> | 8D3   | IgG2a     | +       | +  |               | 18A7  | IgG2a     | +       | -  |
|              | 9G6   | IgG1      | +       | -  | <i>HPyV9</i>  | 19E4  | IgG1      | +       | -  |
| <i>MCPyV</i> | 24D11 | IgG1      | +       | -  |               | 20D3  | IgG1      | +       | -  |
|              | 11A2  | IgG2a     | +       | +  |               | 1F5   | IgG2a     | +       | -  |
| <i>HPyV6</i> | 3A10  | IgG1      | +       | +  |               | 5C4   | IgG1      | +       | -  |
|              | 6A9   | IgG1      | +       | -  |               | 7E2   | IgG1      | +       | -  |
|              | 7B6   | IgG1      | +       | -  |               | 8A10  | IgG1      | +       | -  |
|              | 12H1  | IgG1      | +       | -  |               | 15B11 | IgG2b     | +       | -  |
|              | 15C11 | IgG1      | +       | -  |               | 15B9  | IgG1      | +       | -  |
|              | 19C12 | IgG2b     | +       | +  |               | 18G5  | IgG2a     | +       | -  |
|              | 23E1  | IgG1      | +       | +  | <i>STLPyV</i> | 11A4  | IgG1      | +       | -  |
|              | 25F3  | IgG1      | +       | -  |               | 14A12 | IgG2a     | +       | -  |
|              | 25D8  | IgG1      | +       | +  |               |       |           |         |    |

"+"—positive signal and "-"—no signal.
